# Supplementary material for: Designing neurotransmitter dopamine-functionalized naphthalene diimide molecular architectures for high-performance organic supercapacitor electrode materials
Source: Royal Society of Chemistry journal article supplement (doi:10.1039/d1nj00269d), 2021-01-01
Supplement: d1nj00269d1.pdf [file d1nj00269d1.pdf]

## Supplementary Information

### Designing neurotransmitter dopamine functionalized naphthalene diimide molecular architectures for high-performance organic supercapacitor electrode materials

Madan R. Biradar,<sup>§,†,¶</sup> Akshay V. Salkar,<sup>‡,¶</sup> Pranay P. Morajkar,<sup>\*,‡</sup> Sheshanath V. Bhosale<sup>\*,‡</sup>  
Sidhanath V. Bhosale,<sup>§,†\*</sup>

<sup>§</sup>Polymers and Functional Materials Division, CSIR-Indian Institute of Chemical Technology, Hyderabad-500 007, Telangana, India; <sup>†</sup>Academy of Scientific and Innovative Research (AcSIR), Ghaziabad- 201002, Uttar Pradesh, India; <sup>‡</sup>School of Chemical Sciences, Goa University, Taleigao Plateau- 403206, Goa, India.

<sup>¶</sup> = equal contribution from the first two authors

\*Corresponding Authors: pranay@unigoa.ac.in; svbhosale@unigoa.ac.in; bhosale@iict.res.in

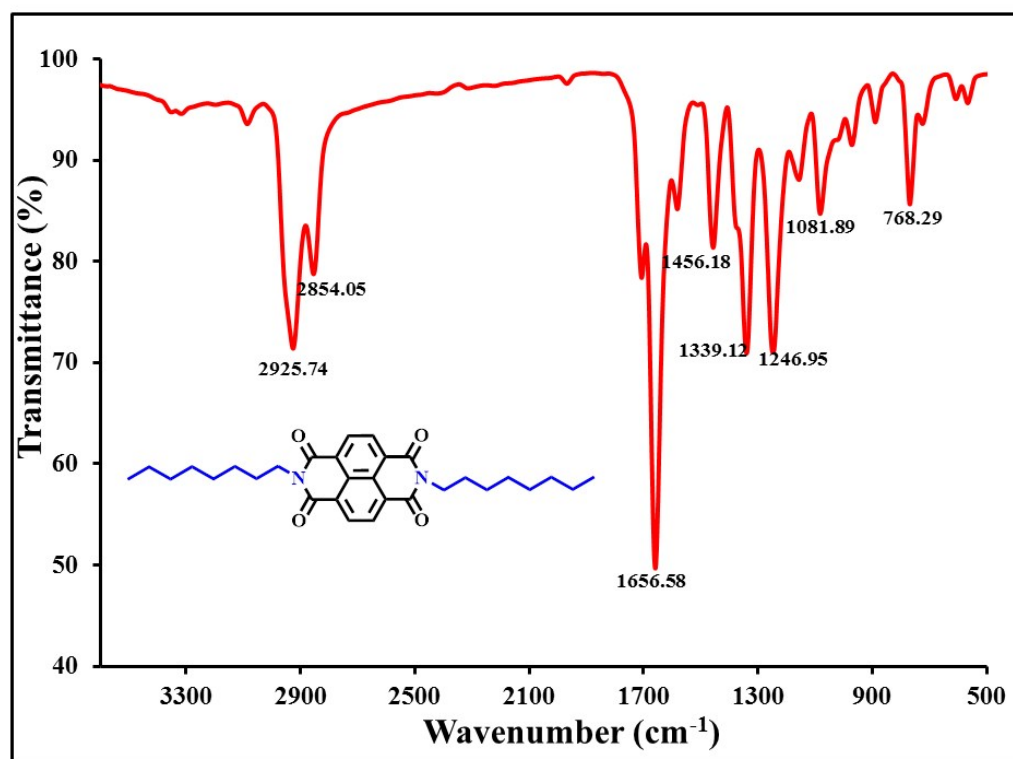

Fig. S1 FT-IR spectra of NDI.

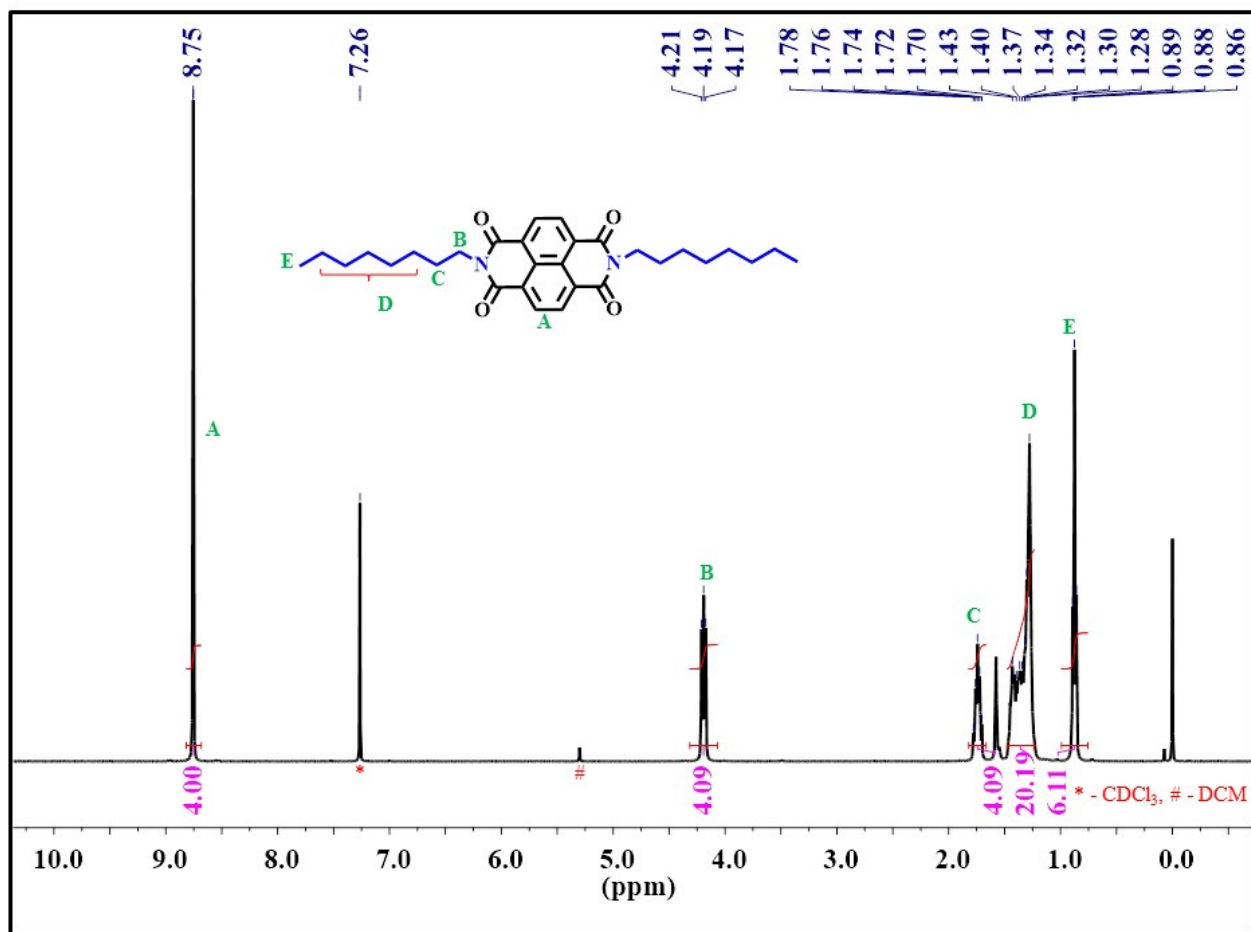

Fig. S2 <sup>1</sup>H NMR spectra of NDI.

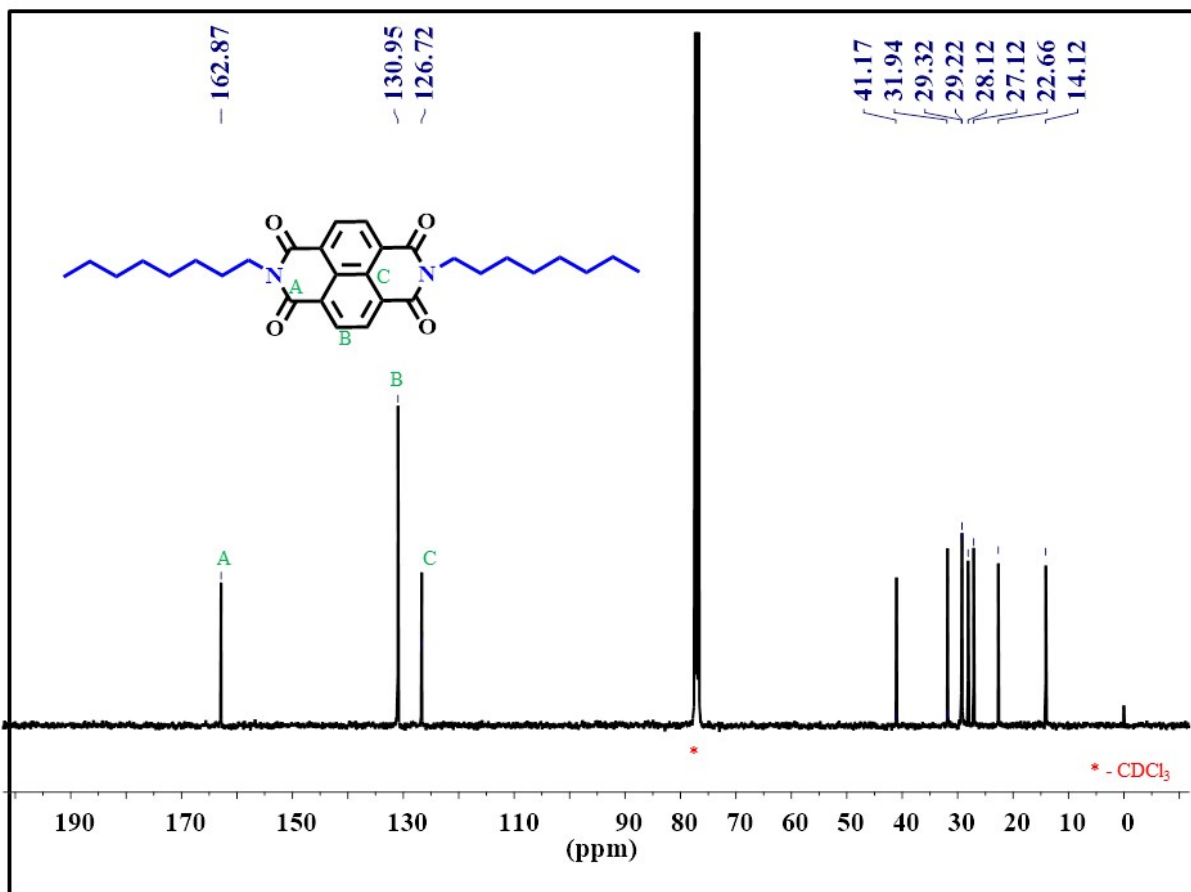

Fig. S3  $^{13}\text{C}$  NMR spectra of NDI.

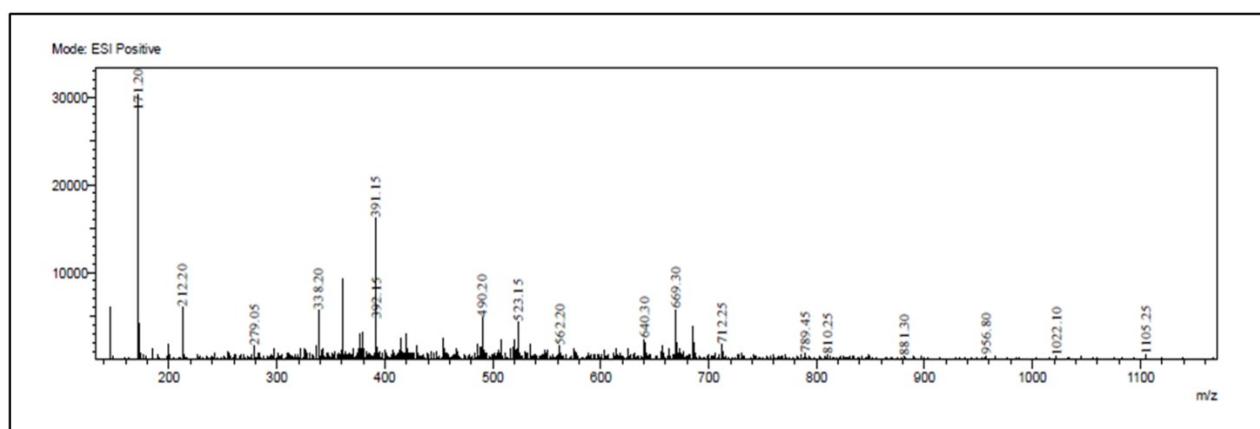

Fig. S4 LR-MS spectrum of NDI.

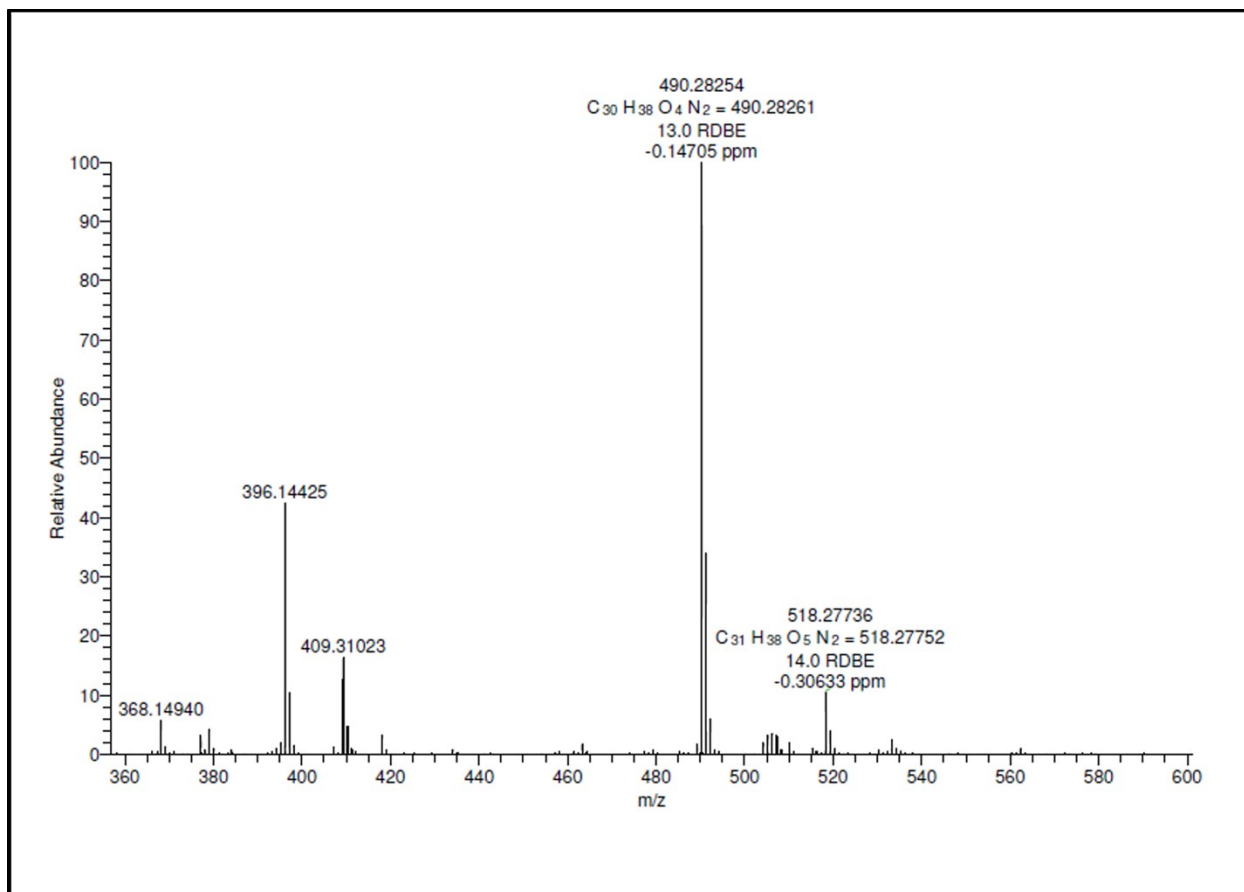

**Fig. S5** HRMS spectrum of NDI

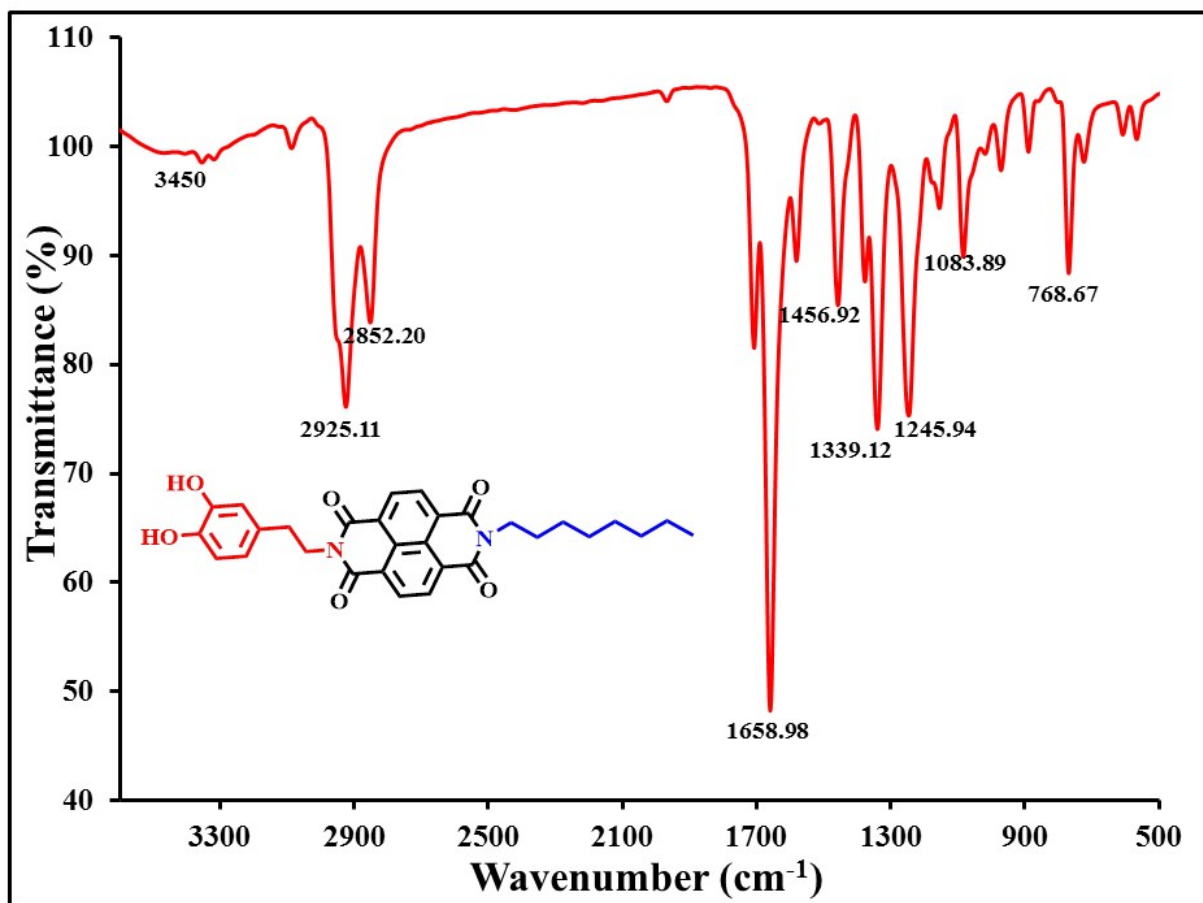

Fig. S6 FT-IR spectra of NDI-1DP.

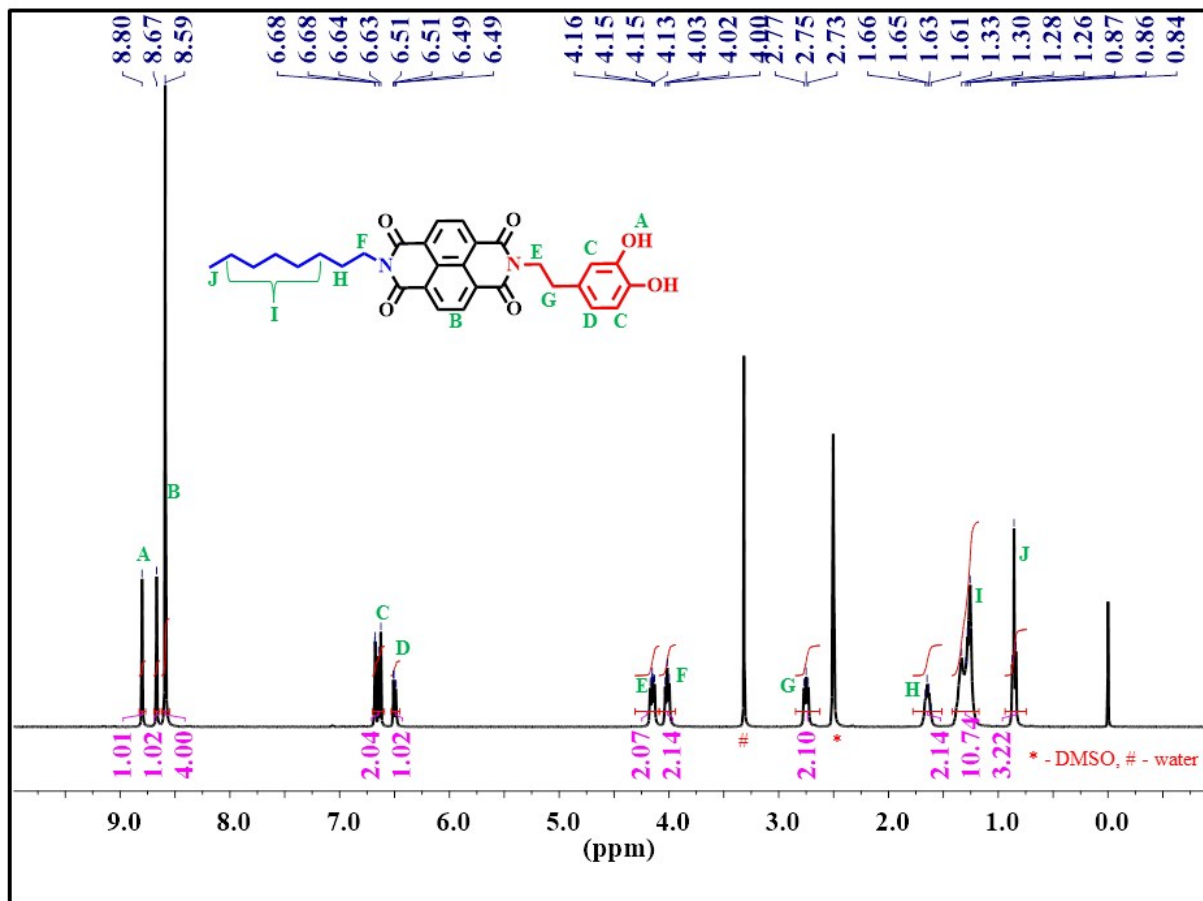

Fig. S7 <sup>1</sup>H NMR spectra of NDI-1DP.

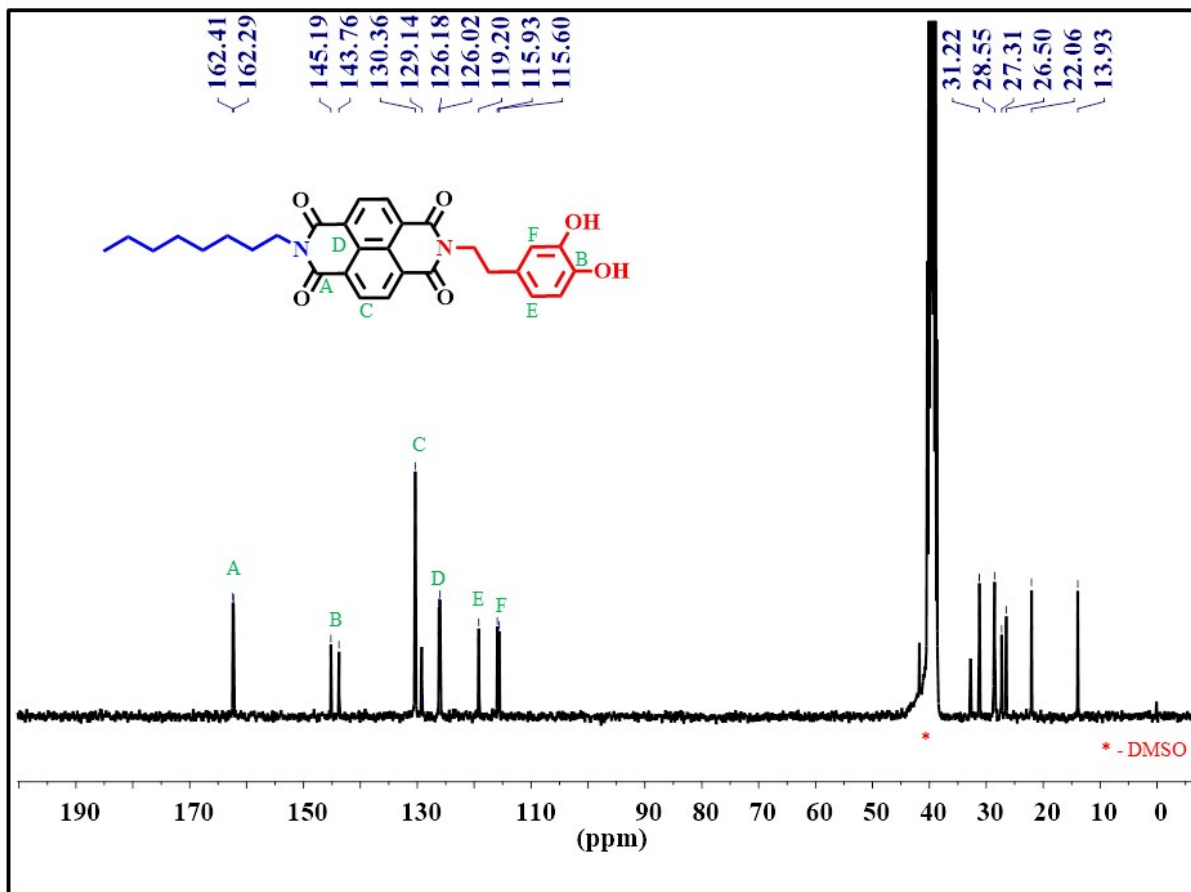

Fig. S8  $^{13}\text{C}$  NMR spectra of NDI-1DP.

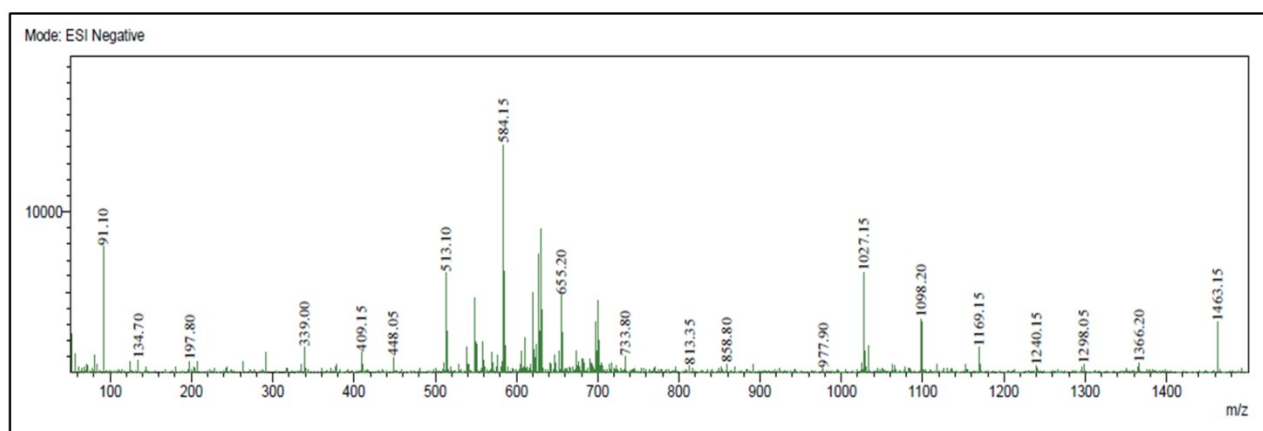

Fig. S9 LR-MS (negative mode) spectrum of NDI-1DP.

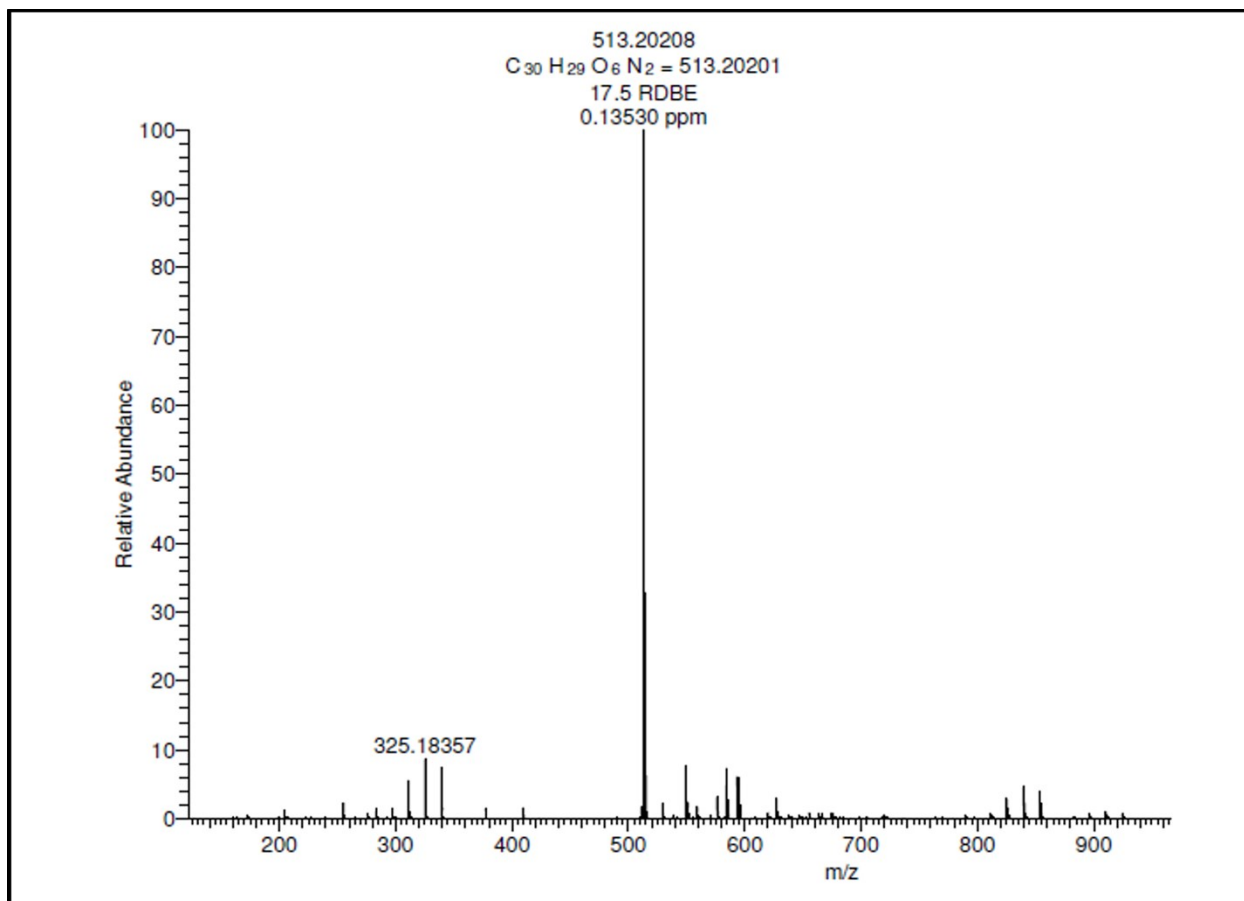

**Fig. S10** HRMS spectrum of NDI-1DP



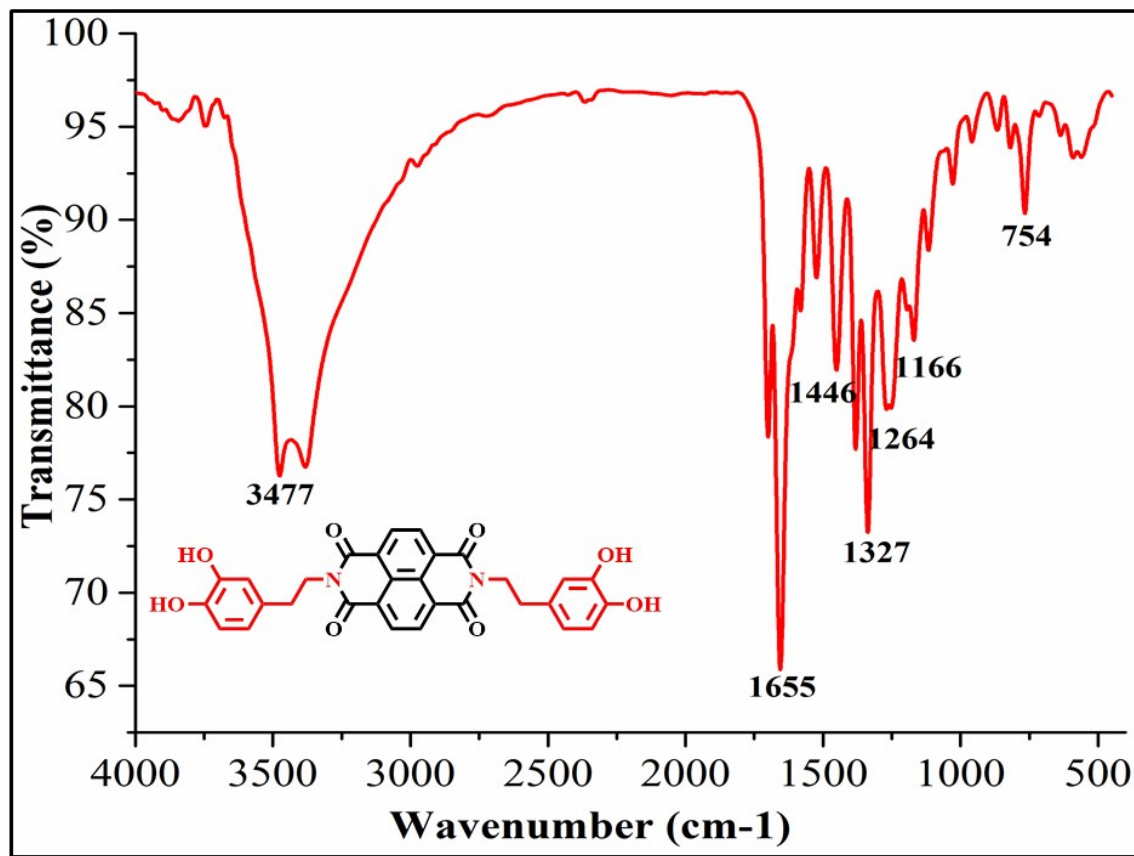

Fig. S11 FT-IR spectra of NDI-2DP.

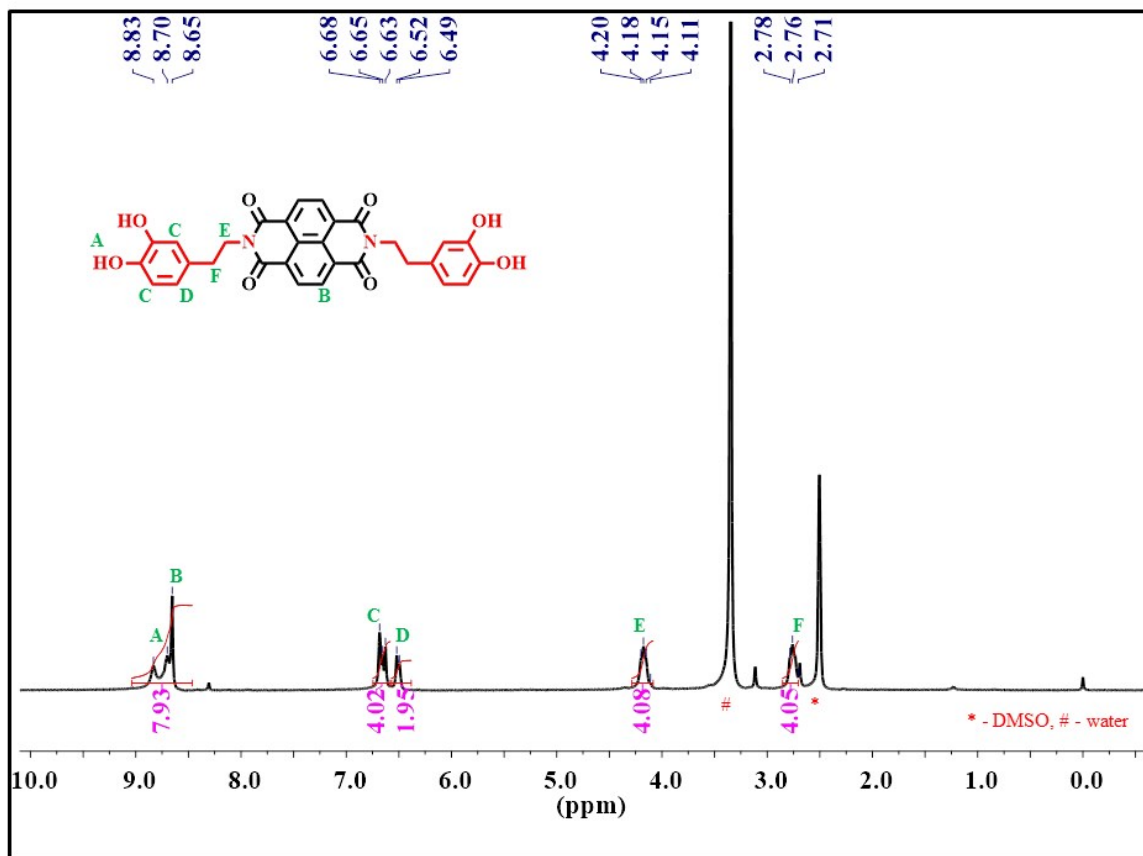

Fig. S12 <sup>1</sup>H NMR spectra of NDI-2DP.

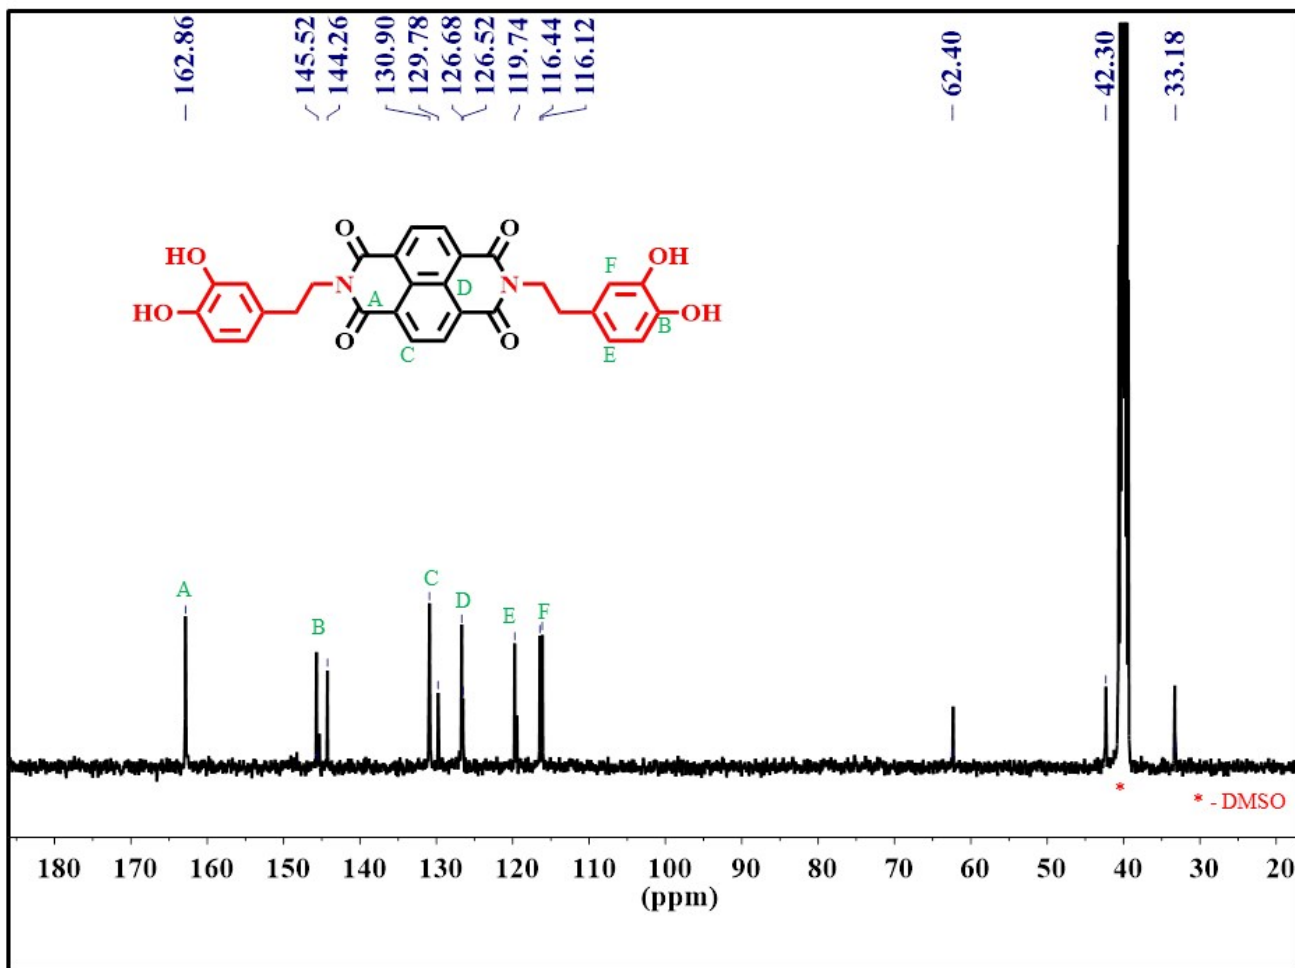

Fig. S13  $^{13}\text{C}$  NMR spectra of NDI-2DP.

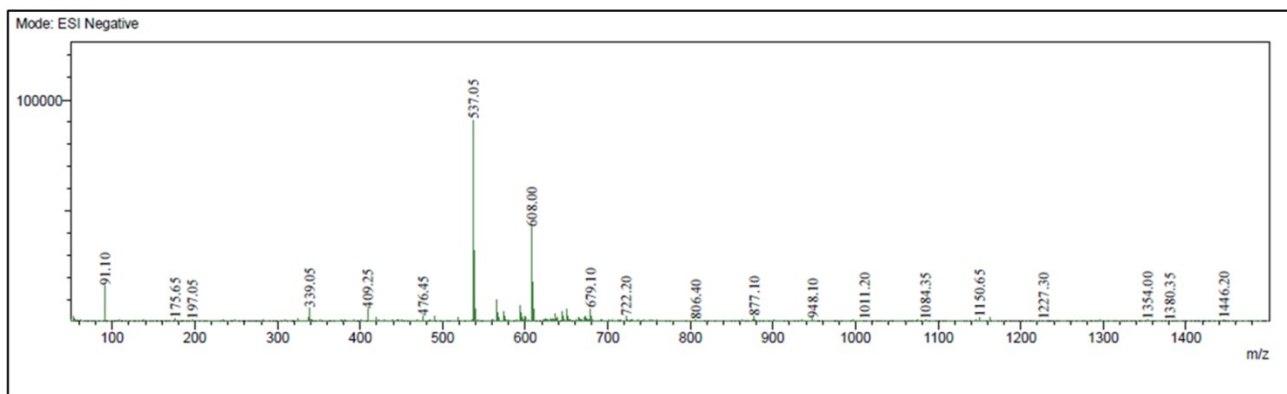

Fig. S14 LR-MS (negative mode) spectrum of NDI-2DP.

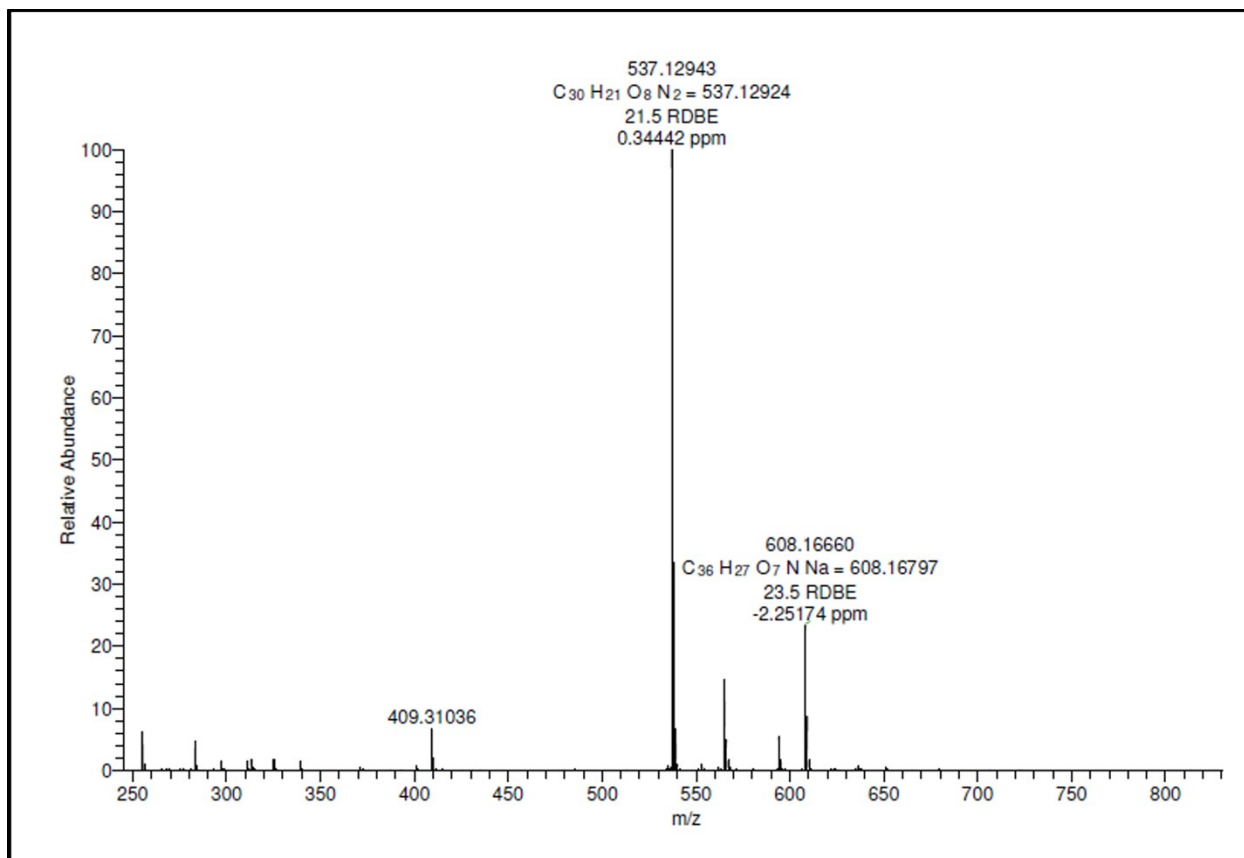

**Fig. S15** HRMS spectrum of NDI-2DP

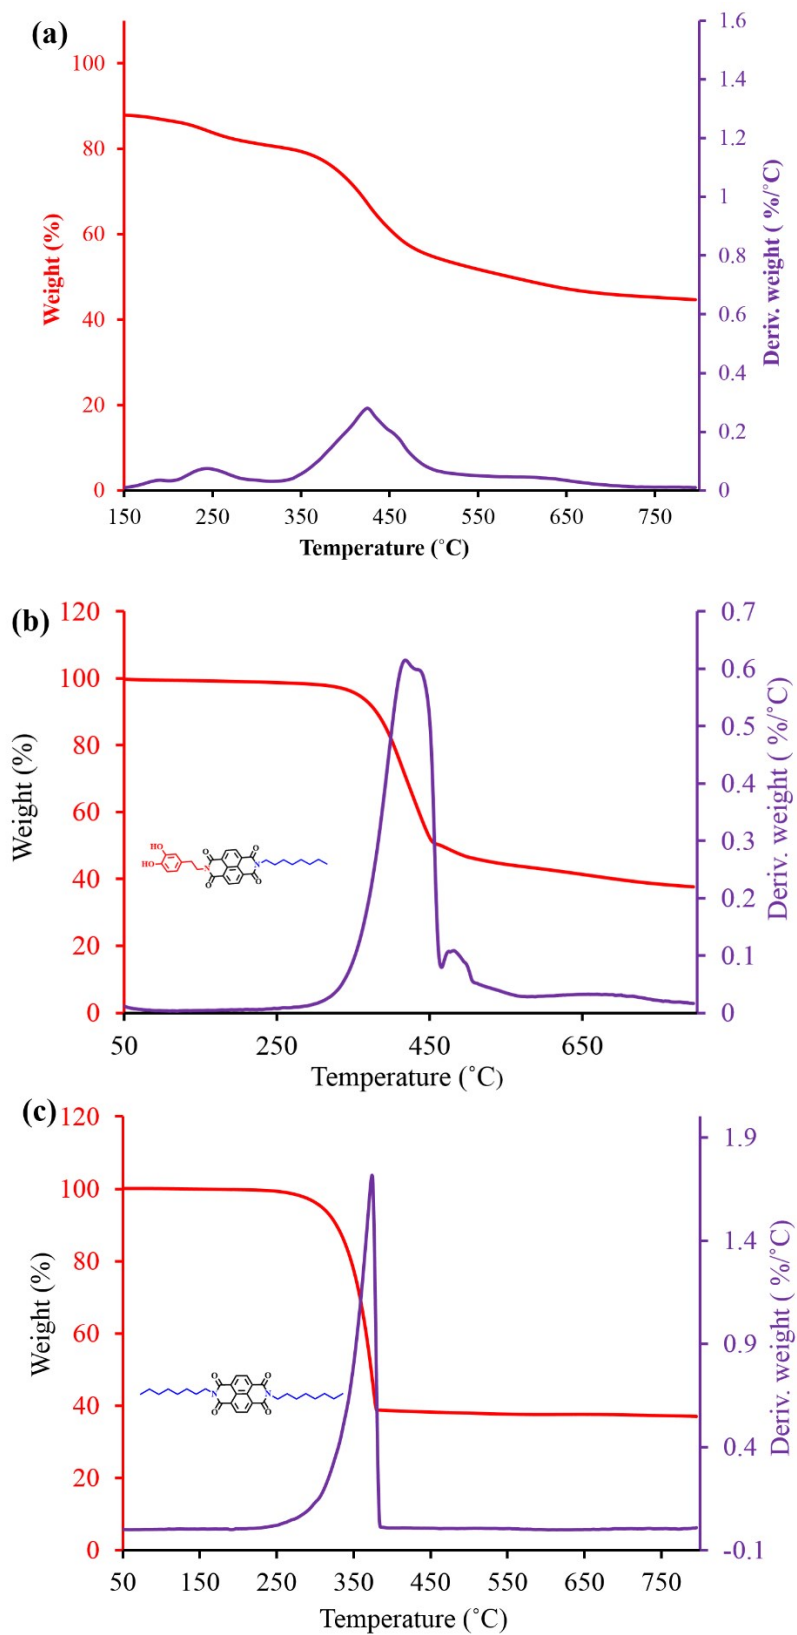

**Fig. S16** Thermogravimetric (TGA) of (a) NDI-2DP, (b) NDI-1DP and (c) NDI.

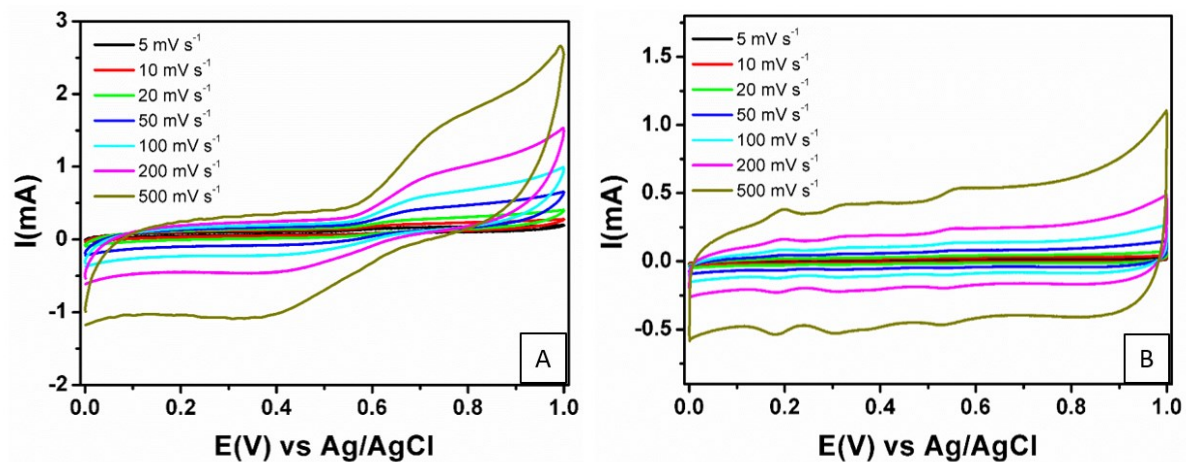

**Fig. S17 Three-electrode system:** Scan rate dependent cyclic voltammograms of (A) NDI-1DP and (B) NDI.

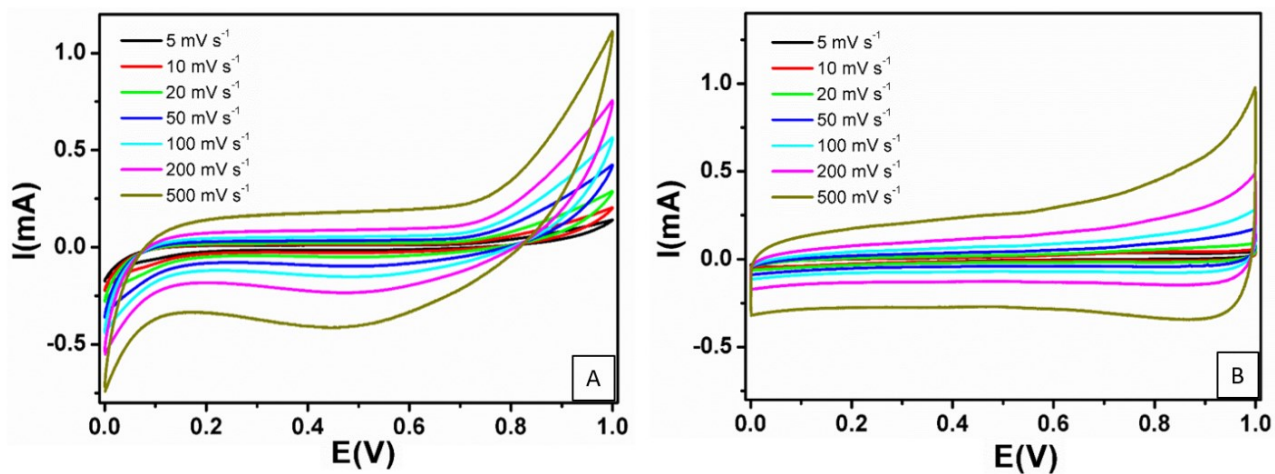

**Fig. S18 Two electrode solid-state symmetric capacitor:** Scan rate dependent cyclic voltammograms of (A) NDI-1DP and (B) NDI.

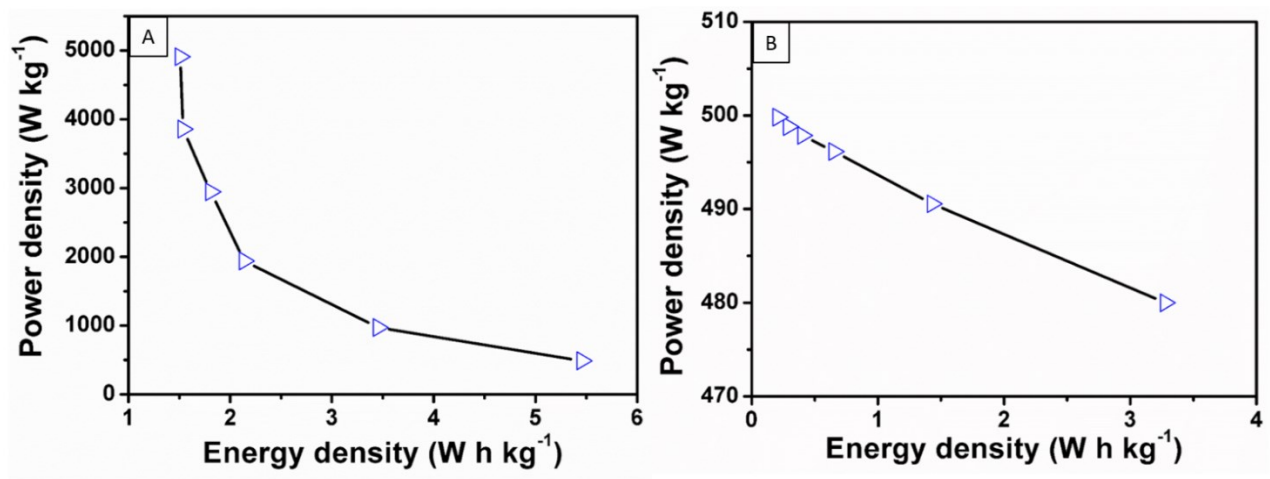

Fig. S19 Ragone plot for the (A) **NDI-1DP** and (B) **NDI** symmetric cell device.

**Table S1.** Comparison of the electrochemical performances of Naphthalenediimide derivatives with other literature.

| Naphthalene diimide derivatives | Electrolyte                          | Single electrode-CV |                                 |                                     | CD          |                                    |                                     | Cycle No. @ Cs (A g <sup>-1</sup> ) retention (%) | Ref No.   |
|---------------------------------|--------------------------------------|---------------------|---------------------------------|-------------------------------------|-------------|------------------------------------|-------------------------------------|---------------------------------------------------|-----------|
|                                 |                                      | Voltage (V)         | Scan rate (mV s <sup>-1</sup> ) | C <sub>s</sub> (F g <sup>-1</sup> ) | Voltage (V) | Curr. Density (A g <sup>-1</sup> ) | C <sub>s</sub> (F g <sup>-1</sup> ) |                                                   |           |
| TPA-1Th-NDI                     | 1 M TEATFB in 1:1 PC and DMC         | -2.0 to 0           | 10                              | -----                               | 0 to 2      | 0.1 mA                             | 22                                  | 500 at 0.1 mA >90%                                | 1         |
| (NIBDZ)                         | 1 M H <sub>3</sub> PO <sub>4</sub>   | 0 to 1              | 100                             | -----                               | 0 to 1      | 0.5                                | 66.56                               | ***                                               | 2         |
| P2 P(NDI2OD - OThCNPV)          | 0.5 M H <sub>2</sub> SO <sub>4</sub> | -0.7 to 0.5         | 10                              | -----                               | -0.7 to 0.5 | 0.5                                | 124                                 | 5000 at 0.5 100%                                  | 3         |
| P1 P(NDI2OD -OThPV)             | 0.5 M H <sub>2</sub> SO <sub>4</sub> | -0.7 to 0.5         | 10                              | -----                               | -0.7 to 0.5 | 0.5                                | 84                                  | -----                                             | 3         |
| P(NDI2OD -T2)                   | 0.5 M H <sub>2</sub> SO <sub>4</sub> | -0.7 to 0.5         | 10                              | -----                               | -0.7 to 0.5 | <sup>a</sup> 0.5                   | 61                                  | -----                                             | 3         |
| P(NDI-Alt-BDT)                  | 1 M PC-LiClO <sub>4</sub>            | -0.2 to 1.1         | 10                              | -----                               | -1.0 to 1   | <sup>b</sup> 0.5                   | 80                                  | -----                                             | 4         |
| P(NDI-r-BDT)                    | 1 M PC-LiClO <sub>4</sub>            | -2.0 to 2.0         | 5                               | -----                               | -1.0 to 1.0 | 0.5                                | 44                                  | -----                                             | 4         |
| NDI-2DP/CP                      | 1 M H <sub>2</sub> SO <sub>4</sub>   | 0 – 1.0             | 5                               | 202.5                               | 0 to 1      | 0.5                                | 195.9                               | 10000 at 3 mA cm <sup>-2</sup> 96 %               | This work |

Tetraethylammonium tetrafluoroborate (TEATFB),  
 Propylene carbonate (PC)  
 Dimethylcarbonate (DMC)

## References



- 1 D.F.Zeigler, S.L.Candelaria, K.A.Mazzio, T.R.Martin, E.Uchaker, S.Suraru, L.J.Kang, G.Cao and C.K.Luscombe, *Macromolecules*, 2015, **15**, 5196-5203.
- 2 A. Roy, S. Mondal, A. Halder, A. Banerjee, D. Ghoshal, A. Paul and S. Malik, *Eur. Poly. J.*, 2017, **93**, 448-457.
- 3 S. Sharma, R. Soni, S. Kurugot and S. K. Asha, *Macromolecules*, 2018, **51**, 954–965.
- 4 S. Sharma, R. Soni, S. Kurugot and S. K. Asha, *J. Phys. Chem. C*, 2019, **123**, 2084–2093.
